# Supplementary material for: Chromatin-mediated regulators of meiotic recombination revealed by proteomics of a recombination hotspot
Source: PubMed Central journal article supplement (PMC6205778; doi:10.1186/s13072-018-0233-x), 2018-10-29
Supplement: 13072_2018_233_MOESM1_ESM.pdf [file 13072_2018_233_MOESM1_ESM.pdf]

Additional file 1 (supplementary material)

## **Chromatin-mediated regulators of meiotic recombination revealed by proteomics of a recombination hotspot**

Aaron J. Storey, Hsin-Ping Wang, Reine U. Protacio, Mari K. Davidson, Alan J. Tackett, and Wayne P. Wahls\*

This file contains:

- Figure S1. Purification and DNA binding of LacI-6xHis-prA fusion protein
- Figure S2. Optimization of conditions for purification of MiniCs
- Figure S3. Normalization of MS data for differences in protein yield
- Figure S4. Pearson correlation coefficients for all pairwise combinations
- Table S1. Genotypes of *S. pombe* strains used in the study
- Table S2. Nuclear and chromatin-associated proteins enriched at the hotspot

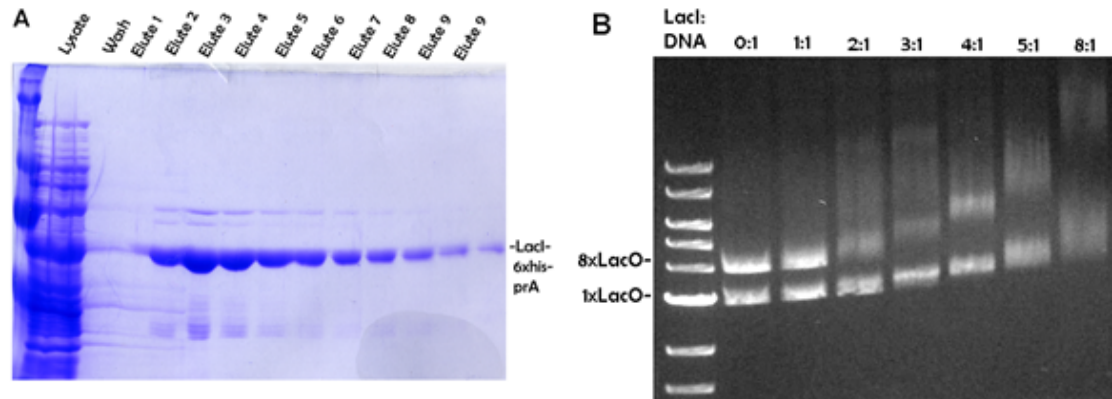

**Figure S1. Purification and DNA binding of LacI-6xHis-prA fusion protein.** (A) Fusion protein expressed in *E. coli* was purified by metal-affinity chromatography; SDS-PAGE shows sequential fractions from elution. (B) Plasmid DNA molecules bearing 1 and 8 copies of the *LacO* DNA site were incubated with the indicated amounts (stoichiometry) of LacI-6xHis-prA; binding reactions were analyzed by agarose gel electrophoresis. The shift in electrophoretic mobility reveals that the LacI moiety still binds efficiently to *LacO* DNA when fused to 6xHis-prA. The progressive increase in shift with increasing protein concentration is as expected given the multivalency of LacI-*LacO* protein-DNA interactions and the number of *LacO* DNA sites that are present. Two aspects of this fusion protein helped us to achieve the extraordinary level of purification of the MiniCs (Figure 2). The first is that interactions between the LacI repressor and the *LacO* DNA sites, and between prA and the Fc portion of IgG, each occur with high affinity. The second is high valency for each binding configuration: the prA tag contains 4 Fc-binding domains (4x Fc); LacI binds to *LacO* as a tetramer (4x LacI); each MiniC contains multiple copies of the binding site (8x *LacO*). Thus there are 128 different binding combinations, located in close proximity, which contribute cooperatively to the affinity and avidity of the binding reactions used to enrich the MiniCs.

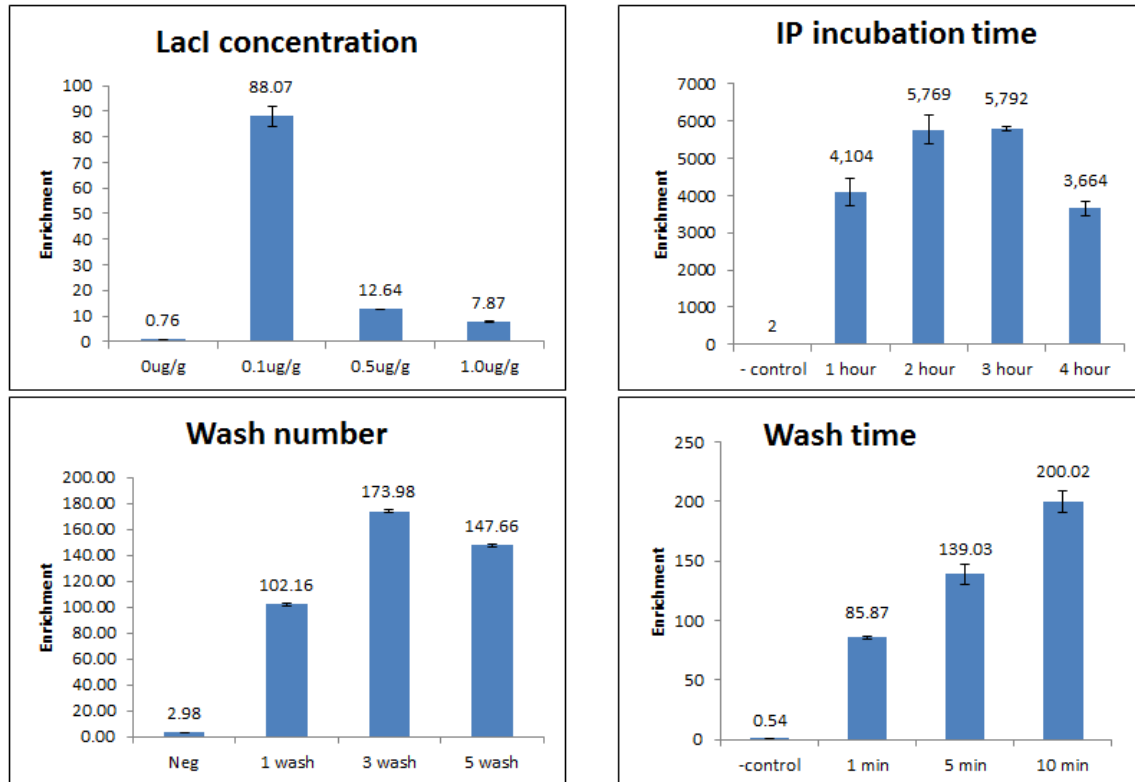

**Figure S2. Optimization of conditions for purification of MiniCs.** Affinity purification experiments were performed under similar conditions aside from the indicated variables. Detailed descriptions of the approach (buffers, order of addition, etc.) and for how we determined the degree of enrichment of MiniCs (using real-time qPCR) are provided in the main text. The most critical parameter was the ratio of Lacl-6xhis-prA (the affinity capture ligand) to protein in the cell extract (top left). The degree of enrichment was also sensitive to how long the magnetic IgG-dynabeads (used to capture Lacl-6xHis-prA and its MiniC cargo) were incubated with extract (top right). Following affinity capture, both the number (bottom left) and duration (bottom right) of washes also affected the degree of enrichment.

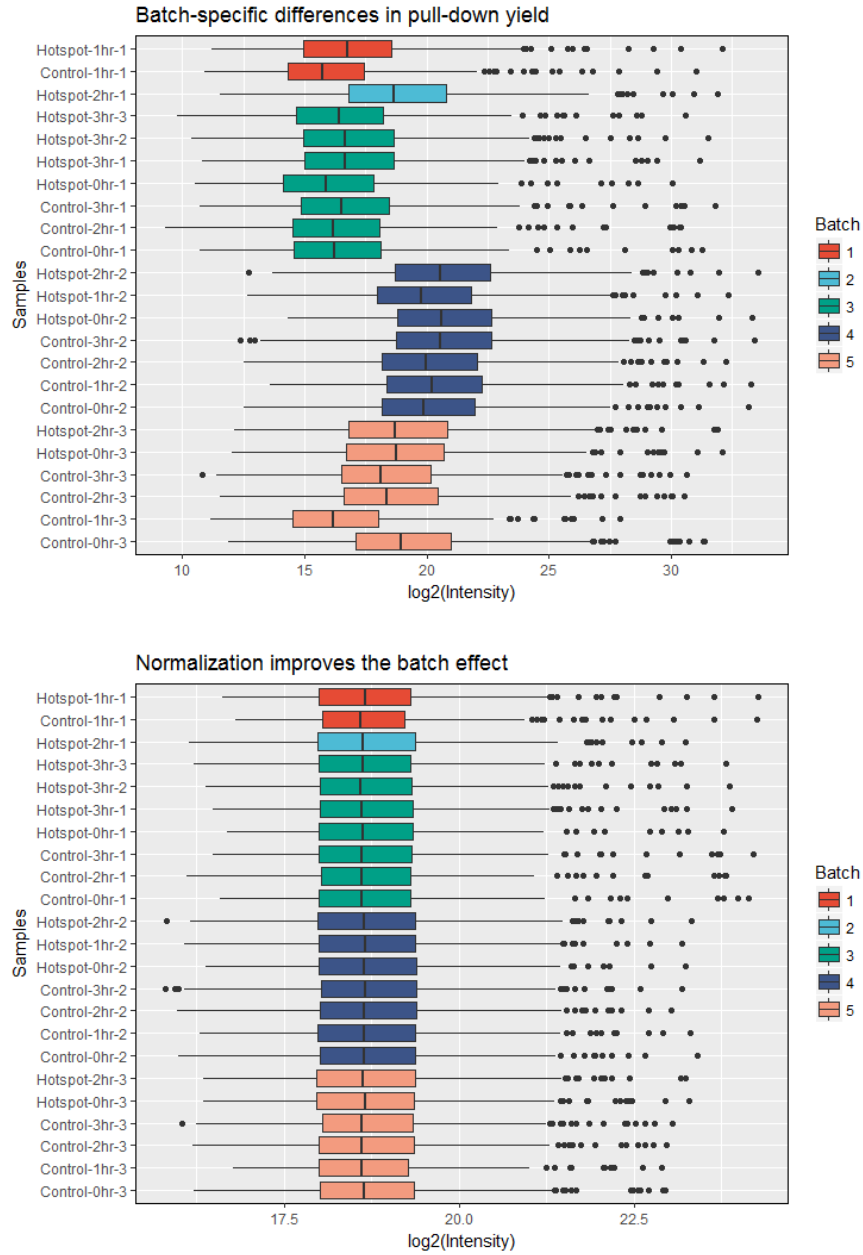

**Figure S3. Normalization of MS data for differences in protein yield.** Bar and whisker plots show the distribution of protein abundance ( $\log_2$  iBAQ values) in each sample, with samples color-coded by batch in which each experiment was conducted. To adjust for the differences in protein yield between samples (top), the distributions within each sample were normalized to the median abundance across all samples. Note that after normalization the intensity distribution for each experiment and between batches are similar (bottom). Calculations were performed in R using the base scaling function and centered around the global median.

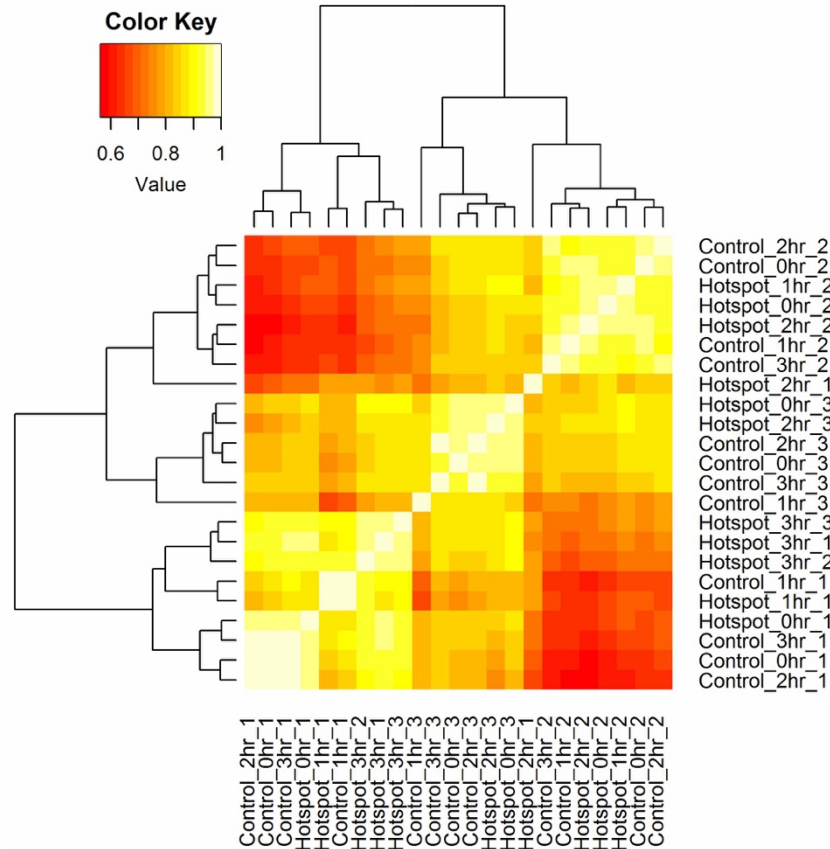

**Figure S4. Pearson correlation coefficients for all pairwise combinations.** As in **Figure 3a**, but with sample labels and dendrograms applied. Heat maps show correlation coefficients ( $r$ ) for all pairwise-combinations of protein data from all experimental conditions and all biological replicates, using the normalized data depicted in **Figure S3**. Hierarchical clustering was used to sort the data by  $r$  value; note that the “neighborhoods” correspond largely to experimental batches shown in **Figure S3**, indicating that batch effects persist to some extent even after normalization.

**Table S1. Genotypes of *S. pombe* strains used in this study.**

| Strain   | Genotype                                                                                                |
|----------|---------------------------------------------------------------------------------------------------------|
| WSP 5748 | <i>h?</i> <i>lys3-37 arg1-230 car2D::kanMX4 pat1-114 ura4D18 leu1D::prALexA ade6-M26-LexABS</i>         |
| WSP 5749 | <i>h?</i> <i>lys3-37 arg1-230 car2D::kanMX4 pat1-114 ura4D18 leu1D::prALexA ade6-M375-LexABS</i>        |
| WSP 5750 | <i>h?</i> <i>ade6-D1 sup35-F592S pat1-114 ura4-D18 leu1D::prALacl (MiniC-M26, ade6-M26 8xLacO ARS1)</i> |
| WSP 5751 | <i>h-</i> <i>ade6-M375 leu1-32 ura4-D18 (pREP41-NTAP-cdCas9)</i>                                        |
| WSP 5752 | <i>h-</i> <i>ade6-M375 leu1-32 ura4-D18 (pREP41-NTAP-cdCas9 pREP42-ade6-gRNA)</i>                       |
| WSP 5753 | <i>h-</i> <i>ade6-M26 leu1-32 ura4-D18 (pREP41-NTAP-cdCas9)</i>                                         |
| WSP 5754 | <i>h-</i> <i>ade6-M26 leu1-32 ura4-D18 (pREP41-NTAP-cdCas9 pREP42-ade6-gRNA)</i>                        |
| WSP 5761 | <i>h?</i> <i>ade6-D1 sup35-F592S pat1-114 (MiniC-M26, ade6-M26 8xLacO ARS1)</i>                         |
| WSP 5784 | <i>h?</i> <i>ade6-D1 sup35-F592S pat1-114 (MiniC-BC, ade6-BC 8xLacO ARS1)</i>                           |
| WSP 6162 | <i>h+</i> <i>fft3D::kanMX4 ade6-M26</i>                                                                 |
| WSP 6163 | <i>h+</i> <i>fft3D::kanMX4 ade6-M375</i>                                                                |
| WSP 6165 | <i>h-</i> <i>fft3D::kanMX4ade6-M210</i>                                                                 |
| WSP 6356 | <i>h-</i> <i>SPBC16H5.12cD::kanMX4</i>                                                                  |
| WSP 6402 | <i>h-</i> <i>ade6-M210 swr1D::kanMX4</i>                                                                |
| WSP 6403 | <i>h+</i> <i>ade6-M210 swr1D::kanMX4</i>                                                                |
| WSP 6404 | <i>h-</i> <i>ade6-M210 swc2D::kanMX4</i>                                                                |
| WSP 6405 | <i>h+</i> <i>ade6-M210 swc2D::kanMX4</i>                                                                |
| WSP 6410 | <i>h+</i> <i>ade6-M210 SPBC16H5.12cD::kanMX4</i>                                                        |
| WSP 6411 | <i>h-</i> <i>ade6-M210 SPBC16H5.12cD::kanMX4</i>                                                        |
| WSP 6429 | <i>h-</i> <i>ade6-M210 rrp2D::kanMX4</i>                                                                |
| WSP 6430 | <i>h+</i> <i>ade6-M210 rrp2D::kanMX4</i>                                                                |
| WSP 6431 | <i>h-</i> <i>ade6-M210 hip1D::kanMX4</i>                                                                |
| WSP 6432 | <i>h+</i> <i>ade6-M210 hip1D::kanMX4</i>                                                                |
| WSP 6433 | <i>h-</i> <i>ade6-M375 swr1D::kanMX4</i>                                                                |
| WSP 6434 | <i>h-</i> <i>ade6-M375 swc2D::kanMX4</i>                                                                |
| WSP 6435 | <i>h-</i> <i>ade6-M375 SPBC16H5.12cD::kanMX4</i>                                                        |
| WSP 6436 | <i>h-</i> <i>ade6-M375 rrp2D::kanMX4</i>                                                                |
| WSP 6437 | <i>h+</i> <i>ade6-M375 hip1D::kanMX4</i>                                                                |
| WSP 6438 | <i>h+</i> <i>ade6-M26 swr1D::kanMX4</i>                                                                 |
| WSP 6439 | <i>h-</i> <i>ade6-M26 swc2D::kanMX4</i>                                                                 |
| WSP 6440 | <i>h+</i> <i>ade6-M26 SPBC16H5.12cD::kanMX4</i>                                                         |
| WSP 6441 | <i>h+</i> <i>ade6-M26 rrp2D::kanMX4</i>                                                                 |
| WSP 6442 | <i>h-</i> <i>ade6-M26 hip1D::kanMX4</i>                                                                 |
| WSP 6606 | <i>h-</i> <i>arp8D::kanMX4 ade6-M26</i>                                                                 |
| WSP 6608 | <i>h-</i> <i>arp8D::kanMX4 ade6-M375</i>                                                                |
| WSP 6609 | <i>h+</i> <i>arp8D::kanMX4 ade6-M210 leu1-32</i>                                                        |
| WSP 6658 | <i>h+</i> <i>nap1D::kanMX4 ade6-M26</i>                                                                 |
| WSP 6659 | <i>h-</i> <i>nap1D::kanMX4 ade6-M375</i>                                                                |

WSP 6660 *h+ nap1D::kanMX4 ade6-M375 leu1-32*  
WSP 6661 *h+ nap1D::kanMX4 ade6-M210 leu1-32*  
WSP 6662 *h- nap1D::kanMX4 ade6-M210*  
WSP 6668 *h- arp5D::kanMX4 ade6-M26*  
WSP 6669 *h- arp5D::kanMX4 ade6-M375*  
WSP 6670 *h- arp5D::kanMX4 ade6-M210*  
WSP 6671 *h+ arp5D::kanMX4 ade6-M210 leu1-32*

---

While standard nomenclature for fission yeast (and this table) uses a “D” to represent a gene deletion, such deletion mutations are referred to as “Δ” in the text and figures (e.g., *ade6-D1* is displayed as *ade6Δ*) to enhance clarity for those unfamiliar with fission yeast nomenclature. Extrachromosomal elements, such as the MiniCs, are in parentheses.





|       |                                                   |               |       |       |       |       |
|-------|---------------------------------------------------|---------------|-------|-------|-------|-------|
| Glr3  | Monothiol glutaredoxin-3                          | SPCC1450.06c  | 0.20  | 5.18  | 1.54  | 4.08  |
| Grc3  | Polynucleotide 5-hydroxyl-kinase grc3             | SPCC830.03    | -3.58 | 5.61  | 3.43  | 0.00  |
| Hir1  | Protein hir1                                      | SPBC31F10.13c | 0.90  | 5.85  | 3.45  | 0.02  |
| Hob1  | Protein hob1                                      | SPBC21D10.12  | 0.23  | -0.28 | 2.39  | -1.07 |
| Hrp1  | Chromodomain helicase hrp1                        | SPAC1783.05   | -0.35 | 4.71  | 3.91  | 0.16  |
| Hrp3  | Chromodomain helicase hrp3                        | SPAC3G6.01    | -4.53 | 0.00  | 1.20  | 0.45  |
| Hsf   | Heat shock factor protein                         | SPAC2E12.02   | 5.02  | 5.40  | 0.00  | 0.00  |
| Hst2  | NAD-dependent protein deacetylase hst2            | SPCC132.02    | 1.10  | 0.29  | 1.26  | 0.09  |
| Hus1  | Checkpoint protein hus1                           | SPAC20G4.04c  | 6.54  | -9.62 | 2.00  | 0.00  |
| Iec1  | INO80 complex subunit 1                           | SPAC144.02    | 4.77  | 5.24  | -0.08 | -5.79 |
| Iec5  | INO80 complex subunit 5                           | SPAPB1E7.14   | -4.47 | 5.91  | 0.00  | 0.00  |
| Ies2  | INO80 complex subunit 2                           | SPAC6B12.05c  | -0.89 | 1.81  | -1.11 | 0.00  |
| Ies6  | Chromatin-remodeling complex subunit ies6         | SPAC222.04c   | -5.24 | 5.52  | -3.88 | -4.68 |
| Ima2  | Importin subunit alpha-2                          | SPBC1604.08c  | 0.00  | 0.00  | 1.29  | -4.55 |
| Imb3  | Importin subunit beta-3                           | SPCC1840.03   | 0.63  | 0.28  | 1.45  | -4.00 |
| Imp3  | U3 small nucleolar ribonucleoprotein protein imp3 | SPAC19D5.05c  | 0.42  | -0.09 | 0.24  | 5.14  |
| Kms1  | Karyogamy meiotic segregation protein 1           | SPAC3A11.05c  | 3.08  | 3.17  | -0.13 | 0.00  |
| Kms2  | Karyogamy meiotic segregation protein 2           | SPBC947.12    | 3.87  | 4.69  | 1.08  | -4.81 |
| Lem2  | Lap-Emerin-Man domain protein 2                   | SPAC18G6.10   | 3.73  | 0.26  | -2.07 | -4.57 |
| Lsm8  | U6 snRNA-associated Sm-like protein LSm8          | SPCC1840.10   | 0.00  | 0.00  | 5.24  | 0.00  |
| Mad1  | Spindle assembly checkpoint component mad1        | SPBC3D6.04c   | -0.23 | -0.26 | 1.27  | -2.17 |
| Mad2  | Mitotic spindle checkpoint component mad2         | SPBC20F10.06  | 0.00  | 0.00  | 5.16  | -4.90 |
| Mal3  | Microtubule integrity protein mal3                | SPAC18G6.15   | 4.01  | -5.29 | 4.17  | 0.00  |
| Mcm7  | DNA replication licensing factor mcm7             | SPBC25D12.03c | 0.13  | 1.04  | 0.32  | -1.47 |
| Mcp6  | Meiotic coiled-coil protein 6                     | SPBC582.06c   | 0.00  | -4.83 | 1.06  | -4.81 |
| Meu18 | Meiotic expression up-regulated protein 18        | SPBC409.11    | 0.00  | 4.76  | -3.29 | 0.00  |
| Mis12 | Centromere protein mis12                          | SPBC409.04c   | -4.18 | 4.83  | 0.00  | 0.00  |
| Mis4  | Sister chromatid cohesion protein mis4            | SPAC31A2.05c  | -0.44 | -0.49 | 1.10  | -3.27 |
| Mmi1  | YTH domain-containing protein mmi1                | SPCC736.12c   | 0.00  | -4.62 | 4.48  | 0.00  |

|       |                                                           |               |       |       |       |       |
|-------|-----------------------------------------------------------|---------------|-------|-------|-------|-------|
| Mst2  | Histone acetyltransferase mst2                            | SPAC17G8.13c  | -5.09 | 4.36  | 0.00  | -3.71 |
| Ndc1  | Nuclear envelope protein ndc1                             | SPAC1786.03   | -0.45 | -0.83 | 0.01  | 1.23  |
| Nsp1  | Nucleoporin nsp1                                          | SPAC26A3.15c  | 0.77  | -0.60 | 1.55  | -6.14 |
| Nu120 | Nucleoporin nup120                                        | SPBC3B9.16c   | -0.06 | -0.47 | 4.64  | 0.00  |
| Nu131 | Nucleoporin nup131                                        | SPBP35G2.06c  | 0.00  | 5.07  | 4.33  | 0.92  |
| Nu186 | Nucleoporin nup186                                        | SPCC290.03c   | 0.78  | -0.23 | 1.56  | -1.43 |
| Nu189 | Nucleoporin nup189                                        | SPAC1486.05   | 0.09  | -4.64 | 1.67  | -3.56 |
| Nuf2  | Kinetochore protein nuf2                                  | SPAC27F1.04c  | 0.00  | 0.00  | 4.05  | 0.00  |
| Nup40 | Nucleoporin nup40                                         | SPAC19E9.01c  | -0.86 | -5.00 | 3.83  | 0.00  |
| Nup61 | Nucleoporin nup61                                         | SPCC18B5.07c  | -0.25 | -4.31 | 1.44  | -3.68 |
| Nup85 | Nucleoporin nup85                                         | SPBC17G9.04c  | 0.01  | 0.21  | 1.18  | -3.22 |
| Orc1  | Origin recognition complex subunit 1                      | SPBC29A10.15  | 0.00  | 4.60  | 1.30  | 0.00  |
| Orc6  | Origin recognition complex subunit 6                      | SPBC2A9.12    | 4.02  | -4.54 | -0.70 | -6.04 |
| P25   | P25 protein                                               | SPAC3C7.14c   | -0.02 | 0.48  | 1.90  | -0.25 |
| Pap   | Poly(A) polymerase pla1                                   | SPBC646.04    | 3.34  | -3.93 | 0.61  | -0.05 |
| Pcr1  | Transcription factor pcr1                                 | SPAC21E11.03c | 0.26  | 1.01  | 0.10  | 1.31  |
| Pdp1  | PWWP domain-containing protein 1                          | SPBC29A3.13   | 0.36  | 1.58  | -3.87 | 5.47  |
| Po152 | Nucleoporin pom152                                        | SPBC29A10.07  | 0.84  | -0.06 | 1.70  | 0.23  |
| Pp12  | Serine/threonine-protein phosphatase PP1-2                | SPCC31H12.05c | -0.36 | 1.34  | 1.31  | -4.27 |
| Ppe1  | Serine/threonine-protein phosphatase ppe1                 | SPCC1739.12   | -0.74 | 6.51  | 0.15  | -5.57 |
| Ppme1 | Protein phosphatase methylesterase 1                      | SPCC1739.12   | 0.31  | -0.15 | 2.58  | 0.05  |
| Prp16 | Pre-mRNA-splicing factor ATP-dependent RNA helicase prp16 | SPBC1711.17   | 3.31  | 4.15  | 0.42  | 0.00  |
| Psb2  | Probable proteasome subunit beta type-2                   | SPAC23D3.07   | -0.77 | -0.38 | 5.75  | -4.57 |
| Pst3  | Paired amphipathic helix protein pst3                     | SPBC1734.16c  | -0.64 | -4.05 | 3.89  | -4.32 |
| Rad9  | DNA repair protein rad9                                   | SPAC664.07c   | -0.51 | -0.29 | 1.60  | -1.52 |
| Rcd1  | Cell differentiation protein rcd1                         | SPAC29B12.06c | -0.14 | -0.10 | 1.59  | -4.76 |
| Rec10 | Meiotic recombination protein rec10                       | SPAC25G10.04c | 0.00  | 0.00  | 3.84  | 0.00  |
| Rec8  | Meiotic recombination protein rec8                        | SPBC29A10.14  | -4.08 | -4.02 | 0.00  | 4.48  |
| Rfa1  | Replication factor A protein 1                            | SPBC660.13c   | 0.00  | 0.89  | 0.00  | 4.20  |
| Rhp23 | UV excision repair protein rhp23                          | SPBC2D10.12   | -0.69 | -5.27 | 2.07  | -5.54 |

|       |                                                           |               |       |       |       |       |
|-------|-----------------------------------------------------------|---------------|-------|-------|-------|-------|
| Rna1  | Ran GTPase-activating protein 1                           | SPAC22E12.07  | 0.00  | -6.37 | 4.45  | -3.74 |
| Rrp4  | Exosome complex component rrp4                            | SPAC2F7.14c   | 0.00  | 4.72  | 0.00  | -3.24 |
| Rrp45 | Exosome complex component rrp45                           | SPCC757.08    | -4.19 | 5.25  | 0.33  | 0.00  |
| Rrp46 | Exosome complex component rrp46                           | SPBC115.01c   | 0.00  | 4.47  | 3.76  | 0.00  |
| Rsc4  | Chromatin structure-remodeling complex subunit rsc4       | SPBC1734.15   | -3.79 | 4.43  | 0.00  | 0.00  |
| Rti1  | DNA repair and recombination protein rti1                 | SPBC119.14    | 0.00  | -4.60 | 4.41  | 0.33  |
| Rxt3  | Transcriptional regulatory protein rxt3                   | SPCC1259.07   | 0.00  | 0.00  | 3.77  | -4.30 |
| Sad1  | Spindle pole body-associated protein sad1                 | SPBC12D12.01  | 0.00  | 5.10  | 0.04  | -5.00 |
| Scc3  | Cohesin subunit psc3                                      | SPAC17H9.20   | -0.22 | 0.00  | 3.60  | 0.00  |
| Sck2  | Serine/threonine-protein kinase sck2                      | SPAC22E12.14c | 0.00  | 0.00  | 5.07  | -4.85 |
| Sec39 | Protein transport protein sec39                           | SPAC7D4.11c   | -1.05 | -3.64 | 1.52  | 0.00  |
| Seh1  | Nucleoporin seh1                                          | SPAC15F9.02   | -0.05 | 1.05  | -0.12 | -2.19 |
| Sid2  | Serine/threonine-protein kinase sid2                      | SPAC24B11.11c | 1.27  | 0.89  | 0.55  | -4.83 |
| Skp1  | Suppressor of kinetochore protein 1                       | SPBC409.05    | -1.07 | 1.00  | 1.03  | -1.13 |
| Slx8  | E3 ubiquitin-protein ligase complex slx8-rfp subunit slx8 | SPBC3D6.11c   | 0.00  | 7.91  | 7.33  | 0.00  |
| Smc1  | Structural maintenance of chromosomes protein 1           | SPBC29A10.04  | 0.09  | -0.22 | 2.17  | -1.68 |
| Smc3  | Structural maintenance of chromosomes protein 3           | SPAC10F6.09c  | -1.07 | -0.88 | 1.36  | 0.12  |
| Smd3  | Small nuclear ribonucleoprotein Sm D3                     | SPBC19C2.14   | 0.25  | 0.35  | 1.77  | -4.91 |
| Sn114 | Pre-mRNA-splicing factor cwf10                            | SPBC215.12    | -0.16 | 0.28  | 4.49  | -3.65 |
| Snd1  | Staphylococcal nuclease domain-containing protein 1       | SPCC645.08c   | 0.23  | 3.84  | 0.98  | -3.18 |
| Snf22 | SWI/SNF chromatin-remodeling complex subunit snf22        | SPCC1620.14c  | -3.88 | 0.00  | 3.35  | 0.00  |
| Snf5  | SWI/SNF chromatin-remodeling complex subunit snf5         | SPAC2F7.08c   | 3.69  | 0.72  | 3.62  | 0.00  |
| Sos7  | Kinetochore protein Sos7                                  | SPAPB17E12.06 | 5.61  | 0.00  | 4.19  | 0.00  |
| Spc24 | Kinetochore protein spc24                                 | SPBC336.08    | 5.30  | 0.00  | -4.32 | 0.60  |
| Spt16 | FACT complex subunit spt16                                | SPBP8B7.19    | -1.51 | 7.39  | -1.42 | -1.37 |
| Spt20 | SAGA complex subunit spt20                                | SPAC4D7.10c   | 3.39  | 0.47  | 4.24  | 0.00  |
| Spt7  | Transcriptional activator spt7                            | SPBC25H2.11c  | -2.93 | -4.60 | 2.91  | 0.00  |
| Ssr2  | SWI/SNF and RSC complexes subunit ssr2                    | SPAC23H3.10   | -4.17 | -0.39 | 3.32  | -0.48 |
| Sts5  | Protein sts5                                              | SPCC16C4.09   | 0.00  | 6.79  | 2.90  | 0.00  |
| Stu1  | Protein peg1                                              | SPAC3G9.12    | 0.00  | -3.68 | 4.21  | -3.20 |
| Sus1  | Transcription and mRNA export factor sus1                 | SPBC6B1.12c   | -0.12 | -5.25 | 1.20  | -4.35 |



|      |                                  |             |      |       |      |       |
|------|----------------------------------|-------------|------|-------|------|-------|
| Ytm1 | Ribosome biogenesis protein ytm1 | SPAC890.04c | 0.00 | -4.24 | 4.08 | -3.20 |
|------|----------------------------------|-------------|------|-------|------|-------|

---

List shows proteins that were enriched greater than two-fold at one or more time points of meiosis and that are annotated in the genome database as being nuclear, chromatin associated, or both. Ratio values (note log<sub>2</sub> scale) indicate greater abundance in hotspot (positive numbers) or basal control (negative numbers) MiniCs, using sum of iBAQ abundance values from three biological replicates except for the 1 hour time point, for which there were two replicates.
